# Supplementary material for: A systematic review of the drug-drug interaction between Statins and Quinolones
Source: Research Square preprint supplement (doi:10.21203/rs.3.rs-3088051/v1), 2023-07-06
Supplement: Supplementary file 1 [file d215336b42b4373965bc5d7f.docx]

**Table 2 Presentation, treatment and recovery of ADRs in case reports of statin-quinolone interactions**

| **Author (year)** | **Time from quinolones initiation to onset**  **of ADR** | **Hospitalization** | **ADR Developed** | **Tests for diagnostic purposes** | **Laboratory examination** | **Presentation of ADR** | **Treatment of ADR** | **Regression of ADR** | **Time to improvement of symptoms** | **Time to normalization of laboratory indicators** | **Outcomes of patients** | **Mortality after adverse drug event** |
| --- | --- | --- | --- | --- | --- | --- | --- | --- | --- | --- | --- | --- |
| Andrea(2013) [7] | 7 days | Yes | Rhabdomyolysis | Routine laboratory exams | CK:33687(U/L) | (1)CK level increased; (2)Renal function decreased; | (1)Discontinuation of atorvastatin and ciprofloxacin; (2)Dialysis; | (1)CK level declined; (2)Renal function increased | 5 days | Unspecified | Improved | No |
| Ankur(2012) [8] | 2 days | Yes | Rhabdomyolysis | Routine laboratory exams | CK:7557(U/L) | (1)Increasing myalgias and fatigu; (2)Diffuse musculartenderness;(3)CK level increased | Discontinuation of levofloxacin | (1)Clinical symptoms resolved; (2)CK was normalized; | 3-5 days | 7 days | Improved | No |
| Asher(2006) [9] | 10 days | Yes | Rhabdomyolysis | Routine laboratory exams | CK:6200(U/L) | (1)Worsening myalgiaand difficulty in walking; (2)Myoglobinuria was present;(3)CK level increased | (1)Discontinuation of levofloxacin and simvastatin; (2)Intravenous hydration was maintained for 5 days | (1)Muscle painand tenderness disappeared; (2)CK level return to normal | 14 days | Unspecified | Improved | No |
| Corrine(2012) [10] | 10 days | Yes | Tendinopathy of the hip | Computed tomography | None | New-onset left lateral hip pain | Discontinuation of simvastatin | (1)Pain was improved at a 10-day recheck; (2)Reintroduction of simvastatin in 6 weeks later | 10 days | Not mentioned | Improved | No |
| Darnis(2011) [11] | 3 days | Yes | Muscular deficit and major rhabdomyolysis | (1)Creatine phosphokinase level:(2)Muscle biopsy | None | Muscular necrosis | Discontinuation of simvastatin | Not mentioned | Unspecified | Unspecified | Improved | No |
| Dorothee(2008) [12] | 3 months | Yes | Myopathy | Electromyography | CK:2976(U/L) | (1)Subacute bilateral proximal paraparesis;(2)CK level increased;(3)Decreased creatinine clearance(30ml/min) | Discontinuation of simvastatin | (1)Muscle strength improved; (2)CK level returned to normal within 1 week; (3)Creatinine clearance increased（44ml/min) | 7 days | 7 days | Improved | No |
| Emily(2020) [13] | 4 days | Yes | Rhabdomyolysis | Routine laboratory exams | LD:1382(U/L);CK:48644(U/L) | (1)The urine was dark amber in colour;(2)CK level increased | Conversion of atorvastatin to pravastatin 10mg daily | CK level returned to normal | Not mentioned | 2 days | Improved | No |
| Farhana(2020) [14] | 1 day | Yes | Muscle weakness | Routine laboratory exams | CK:183(U/L) | (1)Extreme fatigue; (2)Progressing muscle weakness;(3)Agitation and insomnia;(4)CK level increased | Discontinuation of atorvastatin and ciprofloxacin | (1)Muscle weakness resolved; (2)CK level returned to normal in two weeks; (3)Atorvastatin was restarted after a month | 21 days | Unspecified | Improved | No |
| Figueira(2010) [15] | 7 days | Yes | Acute hepatitis | Routine laboratory exams | AST: 329, ALT:953 | Elevation of transaminases | Discontinuation of levofloxacin | (1)Transaminase values in progressive decline; (2)Reintroduction of simvastatin  20 mg in 6 months later | 28 days | 28days | Improved | No |
| Fraser(2016) [16] | 4 days | Yes | Rhabdomyolysis | Routine laboratory exams | CK:24514(U/L);AST:870(U/L), ALT:240(U/L) | (1)A 15-dayhistory of slowly progressing muscle weakness;(2)A 10-day history of dark brown, frothy urine;(3)Liver function disorders;(4)CK level increased | (1)Discontinuation of simvastatin; (2)Management with intravenous crystalloid fluids and urinary catheterisation | (1)Muscle weakness improve; (2)Liver function improved; (3)CK level improved; | 7 days | 7 days | Improved | No |
| Jeannette(2019) [17] | 19 days | Yes | Rhabdomyolysis | Routine laboratory exams | CK:11609(U/L);AST:1613(IU/L) | (1)Muscle pain and weakness;(2)CK level increased | (1)Discontinuation of levofloxacin and atorvastatin; (2)Intravenous saline injection at 150 mL/h | (1)Relevant laboratory values were back to baseline 1 week following hospital discharge; (2)Atorvastatin was resumed several months later. | Unspecified | Unspecified | Improved | No |
| Klinik(2016) [18] | Several days (Not specified) | Yes | Rhabdomyolysis | Routine laboratory exams | CK:10137(U/L);MB:16228μg/L;Tn:1301ng/L;AST:279(U/L);ALT:87(U/L);CK-MB:137U/L;LD:525U/L;SCR:164μmol/L | (1)Muscle weakness of upper and lower limbs;(2)CK level increased | (1)No mention of discontinuing the medication; (2)Force diuresis with 3-4 L NaCl 0.9% daily and start intravenous furosemide;  (3)Alkalinize the urine with sodium bicarbonate. | (1) Increased muscle strength; (2) CK returned to normal after one week; | 7 days | 7 days | Improved | No |
| Maria(2014) [19] | 5 days | Yes | Rhabdomyolysis | (1)Routine laboratory exams;  (2)Physical examination | CK:159450(U/L);AST:1408(U/L) | (1)Increased bilateral legs and arms weakness;(2)CK level increased | (1)Discontinuation of levofloxacin and simvastatin; (2)Treated with intravenous crystalloid hypotonic solution (100mL/h); (3)Urine alkalinization; (4)Physical therapy; | (1)Symptoms improved significantly and muscle and liver enzymes normalized; (2)Normal laboratory parameters； (3)Resumption of simvastatin at 40 mg/day | A few days | A few days | Improved | No |
| Mário Bibi(2021) [20] | 7 days | Yes | Rhabdomyolysis | (1)Routine laboratory exams;(2)Electromyography | CK:17830(U/L) | (1)Generalized muscular weakness;(2)CK level increased | (1)Discontinuation of levofloxacin and ciprofloxacin; (2)Fluid infusion; | (1)Muscle strength and electromyography showed a return to normal after 6 months; (2)CK returned to normal; (3)Restarted antibiotic therapy with 400 mg moxifloxacin daily one month after admission; (4)Statins were reintroduced after antibiotic discontinuation; | 21 days | 21 days | Improved | No |
| Nicolas(2015) [21] | 9 days | Yes | Rhabdomyolysis | Routine laboratory exams | CK:816000(IU/L);LD:19200(IU/L) | (1)Diffuse severe muscle pain with intense weakness;(2)The peritoneal dialysis effluent color appeared reddish;(3)Progressively anuric;(4)Severe electrolyte disorder; | (1)No mention of discontinuing the medication; (2)Maintenance peritoneal dialysis treatment (3 times/day); (3) Refining the genetic analysis of statins | (1)The peritoneal dialysis effluent progressively cleared; (2) Renal function recovered; (3)Normalization of serum creatinine; (4)Correction of electrolyte disorders | Unspecified | 3 days | Improved | No |
| Sawant(2009) [22] | 1 day | Yes | Rhabdomyolysis | Routine laboratory exams | CK:28980(U/L) | (1)Severe muscle weakness and generalised muscle aches for 4 days;(2)Dark discoloration of urine; (3)CK level increased | (1)Discontinuation of ciprofloxacin and simvastatin; (2)Fluid infusion | (1)able to walk with a Zimmer frame; (2)CK levels returned to normal | 23 days | 14 days | Improved | No |

*Note:* CK:Creatine Kinase; LD:Lactate dehydrogenase; AST:Aspartate transaminase; ALT:Alanine amiotransferase; MB:Myoglobin; Tn:Troponin; CK-MB:Creatine Kinase, MB Form; Scr:Serum creatinine

Both the time to improvement of symptoms and the time to normalization of laboratory indicators were calculated from the time the measures were taken.
